# Supplementary material for: Bioequivalence between innovator and generic tacrolimus in liver and kidney transplant recipients: A randomized, crossover clinical trial
Source: PLoS Med. 2017 Nov 14;14(11):e1002428. doi: 10.1371/journal.pmed.1002428 (PMC5685573; doi:10.1371/journal.pmed.1002428)
Supplement: S2 Appendix — (DOCX) [file pmed.1002428.s005.docx]

**S2. Appendix**

**Bioequivalence Between Innovator and Generic Tacrolimus Formulations in Liver and Kidney Transplant Recipients: a Randomized Crossover Clinical Trial**

**Supporting Information – Results**

**Table of Contents**

[A. Population Demographics 3](#_Toc497297617)

[Table Q – Population Demographics – Intent to Treat Population 3](#_Toc497297618)

[B. Adherence Rates 4](#_Toc497297619)

[Table R – Adherence Rates – Intent to Treat Population 4](#_Toc497297620)

[Table S – Adherence Rates – Analyzed Population 4](#_Toc497297621)

[C. Individual Tacrolimus Concentration Time Plots by Tacrolimus Product 5](#_Toc497297622)

[Fig D – Individual Tacrolimus Concentration Time Plots by Tacrolimus Product – Kidney Individuals 5](#_Toc497297623)

[Fig E – Individual Tacrolimus Concentration Time Plots by Tacrolimus Product – Liver Individuals 13](#_Toc497297624)

[D. Tacrolimus AUC Results by Product for CYP3A5 Genotype for Kidney and Liver Individuals....... 24](#_Toc497297625)

[Fig F – Kidney Individuals Expressing CYP3A5 (*1/*3, *1/*1), Tacrolimus AUC Results (n=12) 24](#_Toc497297626)

[Fig G – Kidney Individuals Not Expressing CYP3A5 (*3/*3) Tacrolimus AUC Results (n=23) 25](#_Toc497297627)

[Fig H – Liver Individuals Expressing CYP3A5 (*1/*3; there were no individuals with the *1/*1 genotype), Tacrolimus AUC results (n=6) 26](#_Toc497297628)

[Fig I – Liver Individuals Not Expressing CYP3A5 (*3/*3), Tacrolimus AUC Results (n=30) 27](#_Toc497297629)

[Fig J – Kidney Donors Expressing CYP3A5 (*1/*3, *1/*1), Tacrolimus AUC Results (n=5) 27](#_Toc497297630)

[Fig K – Kidney Donors Not Expressing CYP3A5 (*3/*3), Tacrolimus AUC results (n=12) 28](#_Toc497297631)

[Fig L – Liver Donors Expressing CYP3A5 (*1/*3, *1/*1), Tacrolimus AUC Results (n=10) 28](#_Toc497297632)

[Fig M – Liver Donors Expressing Not CYP3A5 (*3/*3) Tacrolimus AUC Results (n= 14) 29](#_Toc497297633)

[E. Tacrolimus AUC results by product for *ABCB1* transporter genotype for Kidney and Liver Individuals 30](#_Toc497297634)

[Fig N – Kidney Individuals Tacrolimus Product AUC Results by *ABCB1* 3435 genotype C/C, C/T, and T/T 30](#_Toc497297635)

[Fig O – Liver Individuals Tacrolimus Product AUC Results by ABCB1 3435 Genotype C/C, C/T, and T/T 31](#_Toc497297636)

[F. AUC Bioequivalence by Subgroup Testing 32](#_Toc497297637)

[Fig P – Kidney Individuals AUC Bioequivalence Testing by Subgroups 32](#_Toc497297638)

[Fig PA – Generic Hi *versus* Innovator 32](#_Toc497297639)

[Fig PB – Generic Lo *versus* Innovator 33](#_Toc497297640)

[Fig PC – Generic Hi *versus* Generic Lo 34](#_Toc497297641)

[Fig Q – Liver Individuals AUC Bioequivalence Testing by Subgroups 35](#_Toc497297642)

[Fig QA – Generic Hi *versus* Innovator 35](#_Toc497297643)

[Fig QB – Generic Lo *versus* Innovator 36](#_Toc497297644)

[Fig QC– Generic Hi vs Generic Lo 37](#_Toc497297645)

[G. 13-O Desmethyl Tacrolimus AUC Scaled Average Bioequivalence results for Kidney and Liver Individuals 38](#_Toc497297646)

[Table T – Kidney Individuals 13-O-Desmethyl Tacrolimus AUC Scaled Average Bioequivalence Results 39](#_Toc497297647)

[Table U – Liver Individuals 13-O Desmethyl Tacrolimus AUC Scaled Average Bioequivalence Results 40](#_Toc497297648)

[S. Safety Information 41](#_Toc497297649)

[Table V – Adverse Events in Individuals with a Kidney and Liver Transplant Coded by CTCAE v4.0 Disorder Classification 42](#_Toc497297650)

[Fig R – Kidney Function by PK Period in Kidney Individuals 43](#_Toc497297651)

[Fig S – Kidney Function by Tacrolimus Product in Kidney Individuals 44](#_Toc497297652)

[Fig T – Kidney Function by PK Period in Liver Individuals 45](#_Toc497297653)

[Fig U – Kidney Function by Tacrolimus Product in Liver Individuals 46](#_Toc497297654)

[Fig V – Liver Function by PK Period in Liver Individuals 47](#_Toc497297655)

[Fig W – Liver Function by Tacrolimus Product in Liver Individuals 48](#_Toc497297656)

# Population Demographics

Table Q – Population Demographics – Intent to Treat Population

| **Variable** | **Kidney Individuals (n=42)** | **Liver Individuals (n= 40)** |
| --- | --- | --- |
| **Age (yrs) median (IQR)** | 51 (38.0, 59.0) | 58 (51.0, 62.0) |
| **Gender (male)** | 66.7% | 50% |
| **Race (African American)** | 16.7% | 5% |
| **Transplant Donor Type** |  |  |
| **Deceased** | 26.2% | 100% |
| **Living Related** | 33.3% | 0% |
| **Living Unrelated** | 40.5% | 0% |
| **Time post transplant (yrs) median (IQR)** | 4.5 (3.8, 7.9) | 3.2 (1.9, 7.0) |
| **Presence of Diabetes (%)** | 38.1 | 27.5 |
| **Maintenance Immunosuppression** |  |  |
| **Steroids (%)** | 14.3 | 7.5 |
| **Mycophenolic acid (%)** | 100 | 87.5 |
| **Median Tacrolimus Dose (mg/day)** | 4 (4.0, 7.0) | 4 (3.0, 6.0) |

# Adherence Rates

Table R – Adherence Rates – Intent to Treat Population

|  | **Entire Sample** | **Kidney Transplant** | **Liver Transplant** |
| --- | --- | --- | --- |
| **Adherence %, mean ± SD** | 99.65 ± 0.86 | 99.56 ± 1.07 | 99.75 ± 0.56 |
| **Minimum Adherence %** | 94.19 | 94.19 | 97.62 |
| **Maximum Adherence %** | 100.00 | 100.00 | 100.00 |

Table S – Adherence Rates – Analyzed Population

|  | **Entire Sample** | **Kidney Transplant** | **Liver Transplant** |
| --- | --- | --- | --- |
| **Adherence %, M ± SD** | 99.75 ± 0.51 | 99.70 ± 0.59 | 99.81 ± 0.44 |
| **Minimum Adherence %** | 97.67 | 97.67 | 98.81 |
| **Maximum Adherence %** | 100.00 | 100.00 | 100.00 |

# Individual Tacrolimus Concentration Time Plots by Tacrolimus Product

Fig D – Individual Tacrolimus Concentration Time Plots by Tacrolimus Product – Kidney Individuals

Fig E – Individual Tacrolimus Concentration Time Plots by Tacrolimus Product – Liver Individuals

# Tacrolimus AUC Results by Product for CYP3A5 Genotype for Kidney and Liver Individuals.......

Fig F – Kidney Individuals Expressing CYP3A5 (*1/*3, *1/*1), Tacrolimus AUC Results (n=12)

**
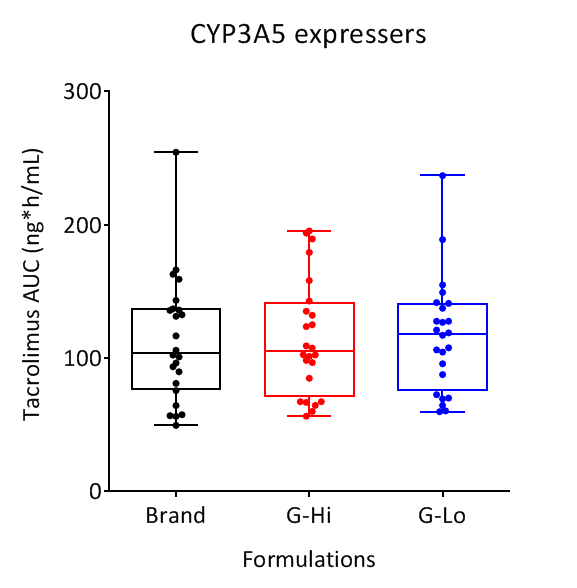
**

p > 0.05

Fig G – Kidney Individuals Not Expressing CYP3A5 (*3/*3) Tacrolimus AUC Results (n=23)

**
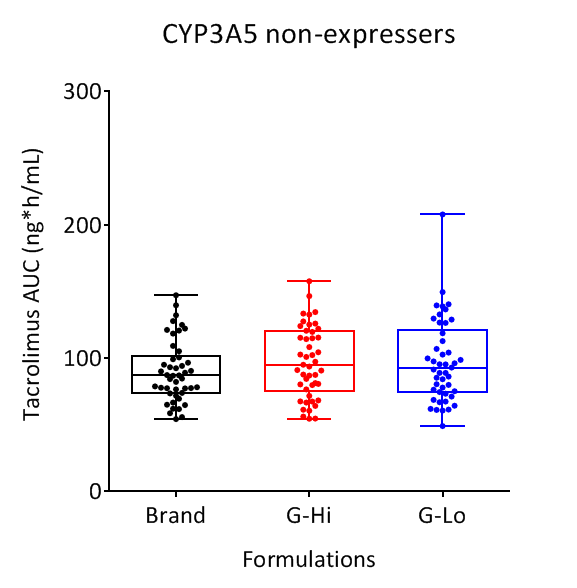
**

p > 0.05

Fig H – Liver Individuals Expressing CYP3A5 (*1/*3; there were no individuals with the *1/*1 genotype), Tacrolimus AUC results (n=6)

*
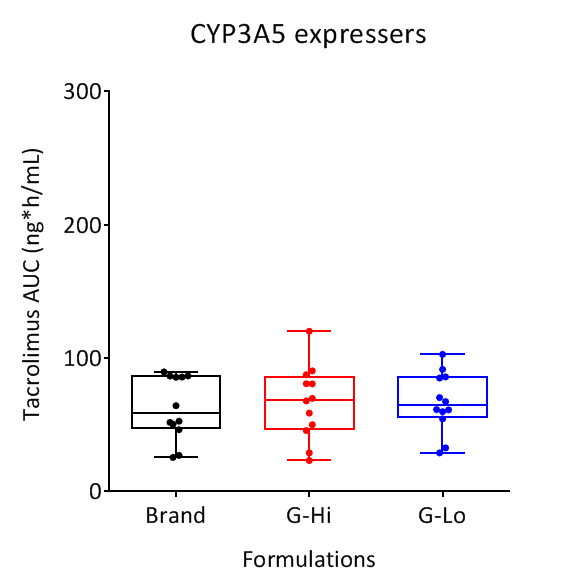
*

p > 0.05

Fig I – Liver Individuals Not Expressing CYP3A5 (*3/*3), Tacrolimus AUC Results (n=30)

*
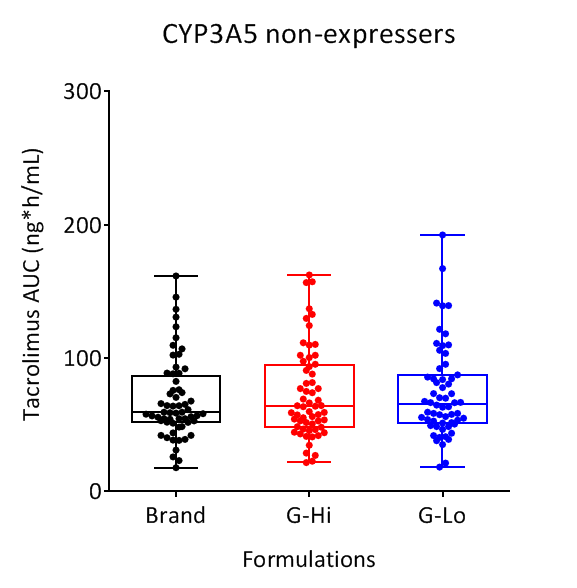
*

p > 0.05

Fig J – Kidney Donors Expressing CYP3A5 (*1/*3, *1/*1), Tacrolimus AUC Results (n=5)

**
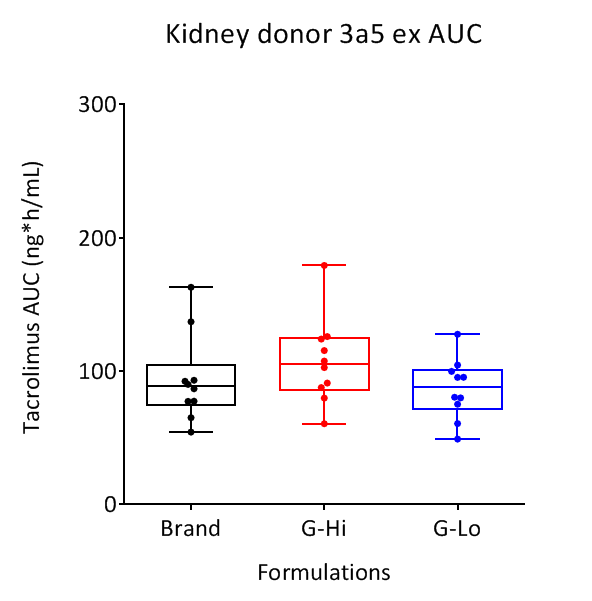
**

p > 0.05

Fig K – Kidney Donors Not Expressing CYP3A5 (*3/*3), Tacrolimus AUC results (n=12)

*
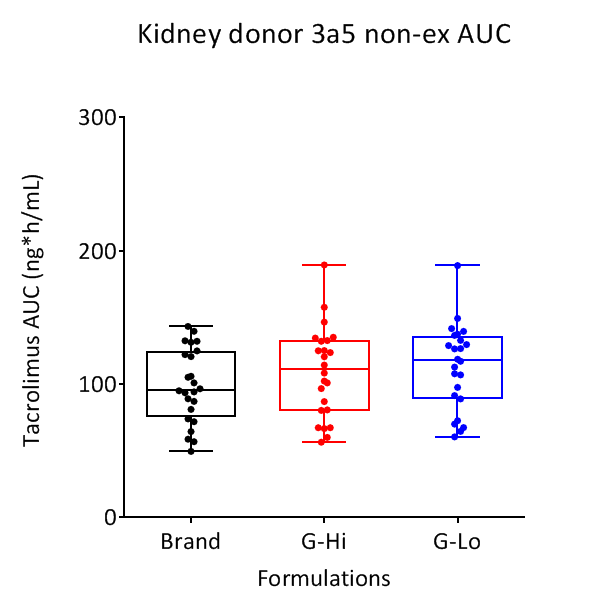
*

p > 0.05

Fig L – Liver Donors Expressing CYP3A5 (*1/*3, *1/*1), Tacrolimus AUC Results (n=10)

*
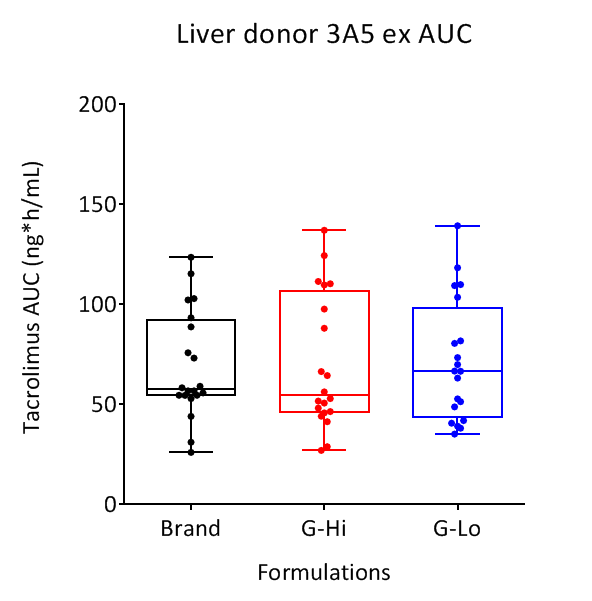
*

p > 0.05

Fig M – Liver Donors Expressing Not CYP3A5 (*3/*3) Tacrolimus AUC Results (n= 14)

p > 0.05

*
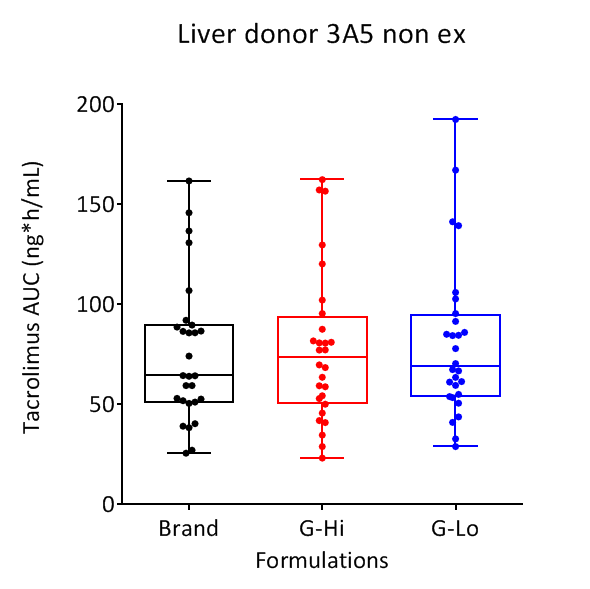
*

# Tacrolimus AUC results by product for *ABCB1* transporter genotype for Kidney and Liver Individuals

Fig N – Kidney Individuals Tacrolimus Product AUC Results by *ABCB1* 3435 genotype C/C, C/T, and T/T

n=10

n=16

n=9

p > 0.05

p > 0.05

p > 0.05

Fig O – Liver Individuals Tacrolimus Product AUC Results by ABCB1 3435 Genotype C/C, C/T, and T/T

p > 0.05

n=8

n=23

n=5

p > 0.05

p > 0.05

# AUC Bioequivalence by Subgroup Testing

Fig P – Kidney Individuals AUC Bioequivalence Testing by Subgroups

### Fig PA – Generic Hi *versus* Innovator

Kidney Individuals AUC Bioequivalence Testing by Subgroups Generic Hi *versus* Innovator. Calculated product confidence interval with SCABE limits denoted by “x” symbols. UCL σWT/σWR = Upper 90% confidence interval for ratio of the within subject standard deviation of the test product to the reference product.

### Fig PB – Generic Lo *versus* Innovator

Kidney Individuals AUC Bioequivalence Testing by Subgroups Generic Lo v*ersus* Innovator Calculated product confidence interval with SCABE limits denoted by “x” symbols. UCL σWT/σWR = Upper 90% confidence interval for ratio of the within subject standard deviation of the test product to the reference product.

### Fig PC – Generic Hi *versus* Generic Lo

Kidney Individuals AUC Bioequivalence Testing by Subgroups Generic Hi vs Generic Lo. Calculated product confidence interval with SCABE limits denoted by “x” symbols. UCL σWT/σWR = Upper 90% confidence interval for ratio of the within subject standard deviation of the test product to the reference product.

Fig Q – Liver Individuals AUC Bioequivalence Testing by Subgroups

### Fig QA – Generic Hi *versus* Innovator

Liver Individuals AUC Bioequivalence Testing by Subgroups Generic Hi vs Innovator. Calculated product confidence interval with SCABE limits denoted by “x” symbols. UCL σWT/σWR = Upper 90% confidence interval for ratio of the within subject standard deviation of the test product to the reference product.

### Fig QB – Generic Lo *versus* Innovator

Liver Individuals AUC Bioequivalence Testing by Subgroups Generic Lo *versus* Innovator Calculated product confidence interval with SCABE limits denoted by “x” symbols. UCL σWT/σWR = Upper 90% confidence interval for ratio of the within subject standard deviation of the test product to the reference product.

### Fig QC– Generic Hi vs Generic Lo

Liver Individuals AUC Bioequivalence Testing by Subgroups Generic Hi *versus* Generic Lo. Calculated product confidence interval with SCABE limits denoted by “x” symbols. UCL σWT/σWR = Upper 90% confidence interval for ratio of the within subject standard deviation of the test product to the reference product.

# 13-O Desmethyl Tacrolimus AUC Scaled Average Bioequivalence results for Kidney and Liver Individuals

Evaluation of metabolite concentrations were conducted only on AUC parameters to quantitate extent of metabolite exposure. As Cmax is considered a surrogate marker of the rate of absorption in bioequivalence, the analysis of the Cmax of 13-O-desmethyl tacrolimus would be irrelevant, as 13-O-desmethyl tacrolimus is not absorbed. Instead it is generated *in vivo* by cytochrome P4503A-mediated biotransformation of tacrolimus.

Table T – Kidney Individuals 13-O-Desmethyl Tacrolimus AUC Scaled Average Bioequivalence Results

| **Reference** | **Test** | **AUC**  **Geometric mean ratio (%)** | **Reference**  **Within Subject variability**  **(sWR, %)** | **Observed**  **90%**  **Confidence Interval** | **Confidence Bound** | **SCABE**  **limit** | **Variability Comparison (1statistics of σWT/σWR)** |
| --- | --- | --- | --- | --- | --- | --- | --- |
| innovator | Generic Hi | 110.15 | 24.40 | 104.38-116.23 | -0.033 | 80.00-125.00 | 1.70 |
| Innovator | Generic Lo | 96.81 | 24.40 | 90.29-103.80 | -0.044 | 80.00-125.00 | 1.02 |
| Generic  hi | Generic lo | 87.89 | 30.85 | 82.49-93.64 | -0.051 | 80.00-125.00 | 0.81 |
| Generic  lo | Generic hi | 113.78 | 18.51 | 106.79-121.23 | -0.0020 | 82.28-121.53 | 2.24 |

1The upper limit of the 90% confidence interval of the ratio of within-subject standard deviation of test product to reference product, σWT/σWR.

Table U – Liver Individuals 13-O Desmethyl Tacrolimus AUC Scaled Average Bioequivalence Results

| **Reference** | **Test** | **AUC**  **Geometric mean ratio (%)** | **Reference**  **Within Subject variability**  **(sWR, %)** | **Observed**  **90%**  **Confidence Interval** | **Confidence Bound** | **SCABE**  **limit** | **Variability Comparison (1statistics of σWT/σWR)** |
| --- | --- | --- | --- | --- | --- | --- | --- |
| innovator | Generic Hi | 98.41 | 24.25 | 92.82-104.33 | -0.045 | 80.00-125.00 | 1.38 |
| Innovator | Generic Lo | 104.68 | 24.25 | 99.27-110.39 | -0.043 | 80.00-125.00 | 1.20 |
| Generic  hi | Generic lo | 106.38 | 24.97 | 99.27-113.99 | -0.041 | 80.00-125.00 | 1.17 |
| Generic  lo | Generic hI | 94.00 | 21.79 | 87.73-100.73 | -0.029 | 80.00-125.00 | 1.53 |

1The upper limit of the 90% confidence interval of the ratio of within-subject standard deviation of test product to reference product, σWT/σWR.

# S. Safety Information

Adverse event information was collected at each study visits. Events were collected in lay terms and then classified by Common Toxicity Criteria for Adverse Events (CTCAEv4.0). [15] The Table X describes the adverse events by organ transplant type and tacrolimus product.

Table V – Adverse Events in Individuals with a Kidney and Liver Transplant Coded by CTCAE v4.0 Disorder Classification

| **Disorder Classification** | **Innovator** | | **Generic Hi** | | **Generic Lo** | |
| --- | --- | --- | --- | --- | --- | --- |
| **Kidney** | **Liver** | **Kidney** | **Liver** | **Kidney** | **Liver** |
| Nervous system | 1 (1) | 6 (6) | 2 (2) | 5 (6) | 1 (1) | 3 (4) |
| Blood and lymphatic system |  |  |  |  |  | 1 (1) |
| Metabolism and nutrition | 4 (4) |  | 3 (3) | 2 (2) | 1 (1) | 1 (1) |
| Gastrointestinal | 1 (1) | 6 (8) | 1 (1) | 2 (2) | 7 (9) | 4 (4) |
| Respiratory, thoracic and mediastinal | 1 (2) |  | 2 (2) | 1 (1) | 1 (2) |  |
| Musculoskeletal and connective tissue |  |  |  |  |  |  |
| Reproductive system and breast disorders |  |  |  | 1 (1) |  |  |
| Infections and infestations |  |  | 1 (1) |  |  |  |
| Skin and subcutaneous tissue | 1 (1) |  |  |  |  |  |
| Psychiatric |  |  |  |  | 1 (1) |  |
| Vascular | 1 (1) | 1 (1) | 1 (1) | 1 (1) |  |  |
| Investigations | 4 (5) |  | 1 (1) |  | 1 (1) |  |
| Eye disorder |  |  |  | 1 (1) |  |  |
| General disorders and administrative site conditions | 5 (6) | 1 (1) | 4 (4) | 1 (1) | 6 (7) | 8 (8) |

n = number of individuals with at least one occurrence of each adverse event

nAE= total number of times the AE occurs across all individuals

Fig R – Kidney Function by PK Period in Kidney Individuals

**
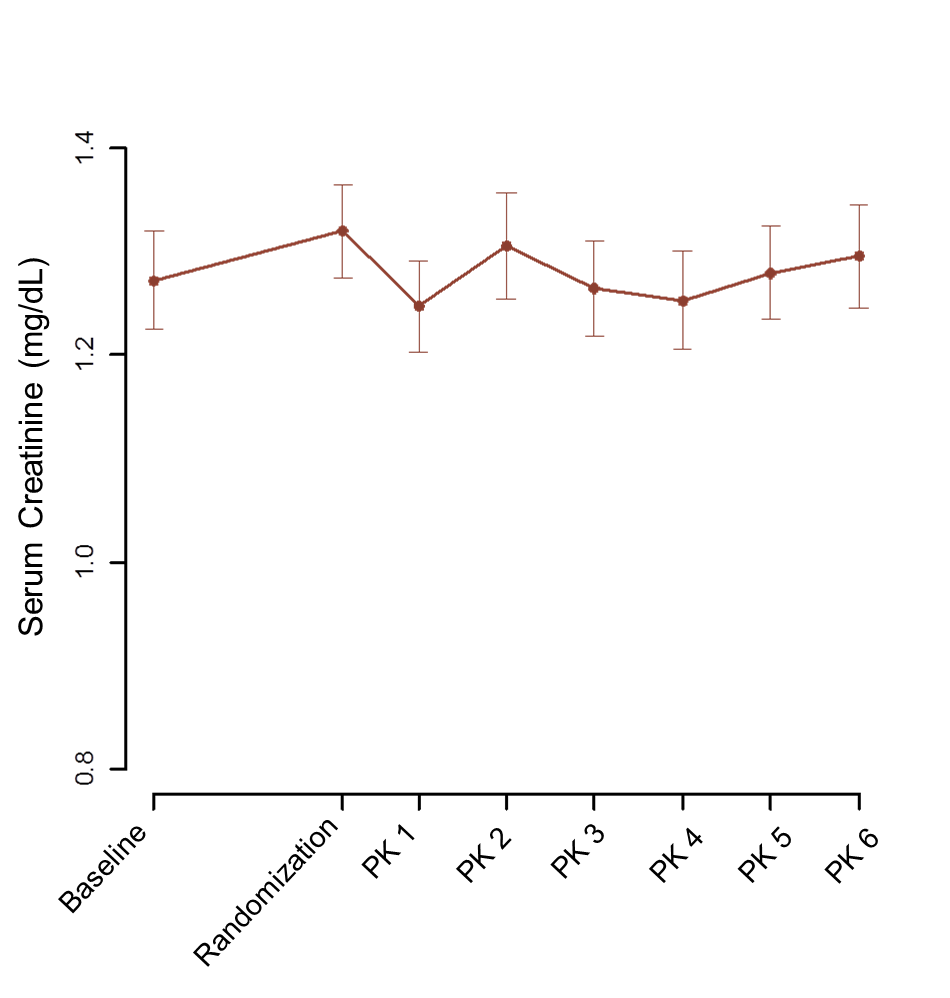
**

(mean ± SEM)

Fig S – Kidney Function by Tacrolimus Product in Kidney Individuals


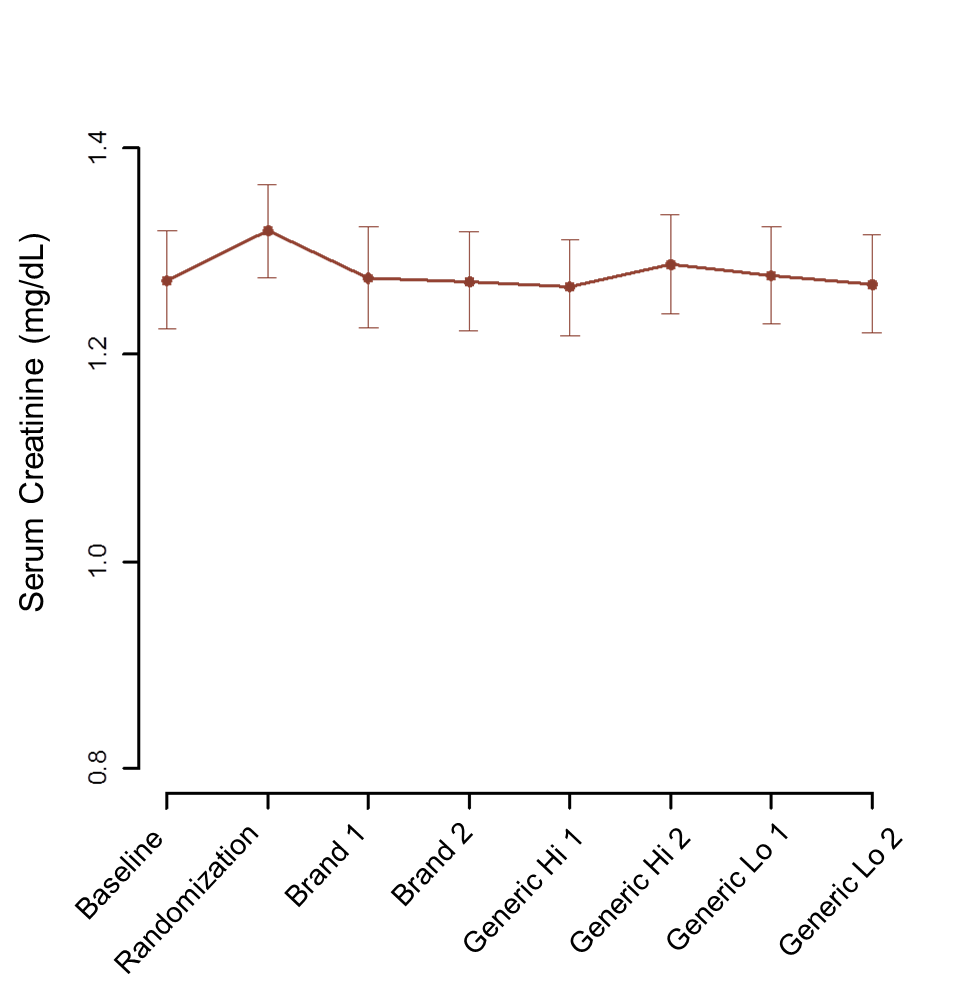


(mean ± SEM)

Fig T – Kidney Function by PK Period in Liver Individuals

*
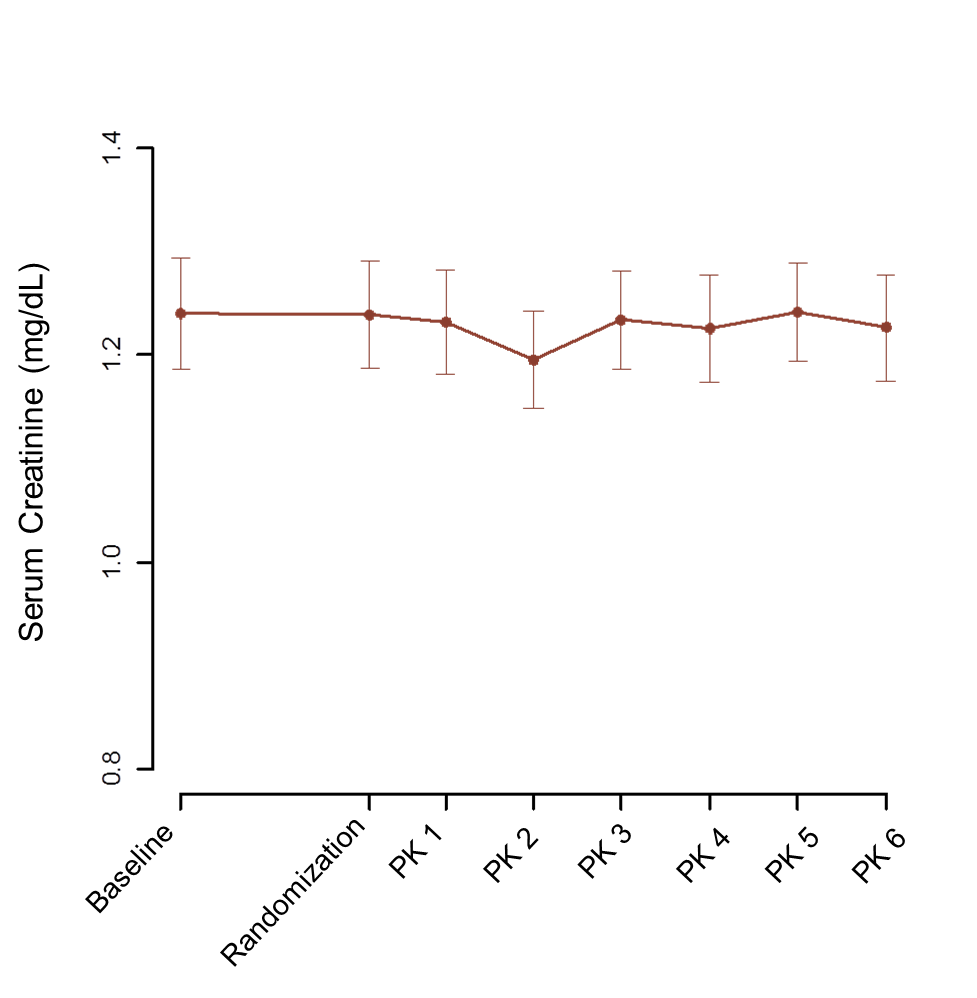
*

(mean ± SEM)

Fig U – Kidney Function by Tacrolimus Product in Liver Individuals


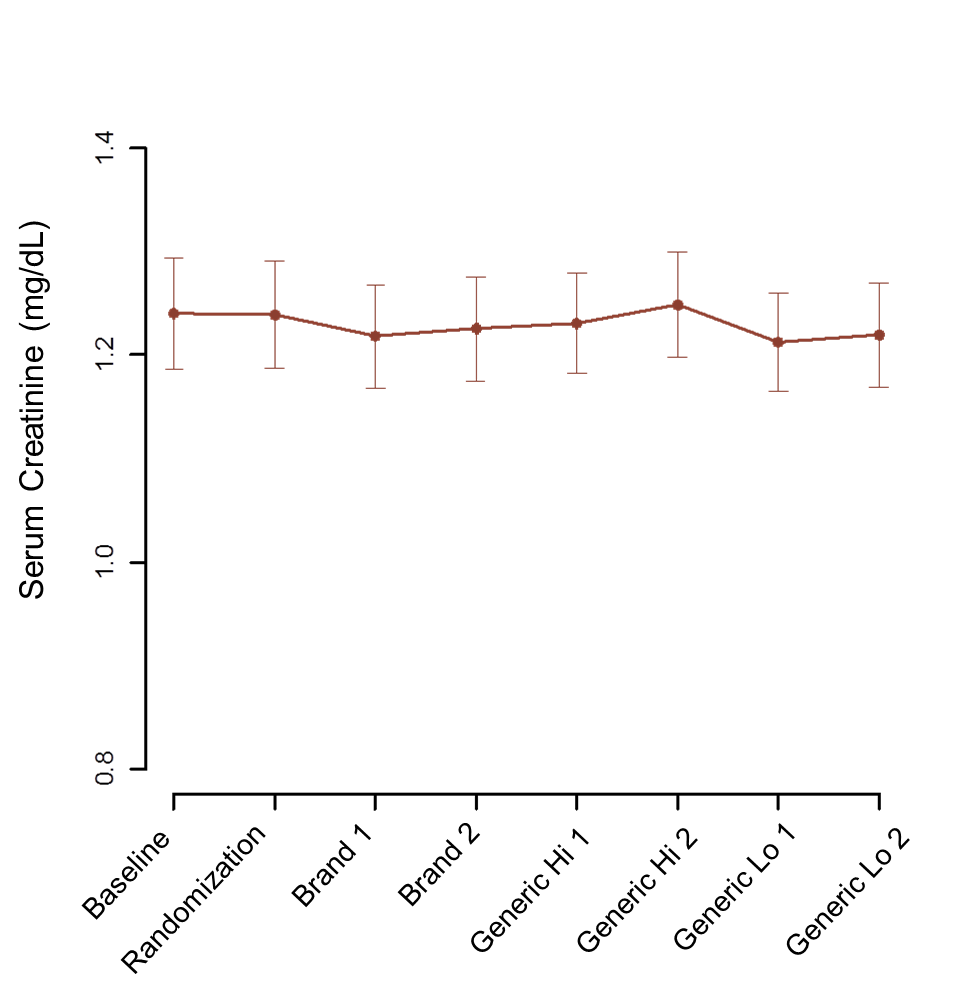


(mean ± SEM)

Fig V – Liver Function by PK Period in Liver Individuals

*
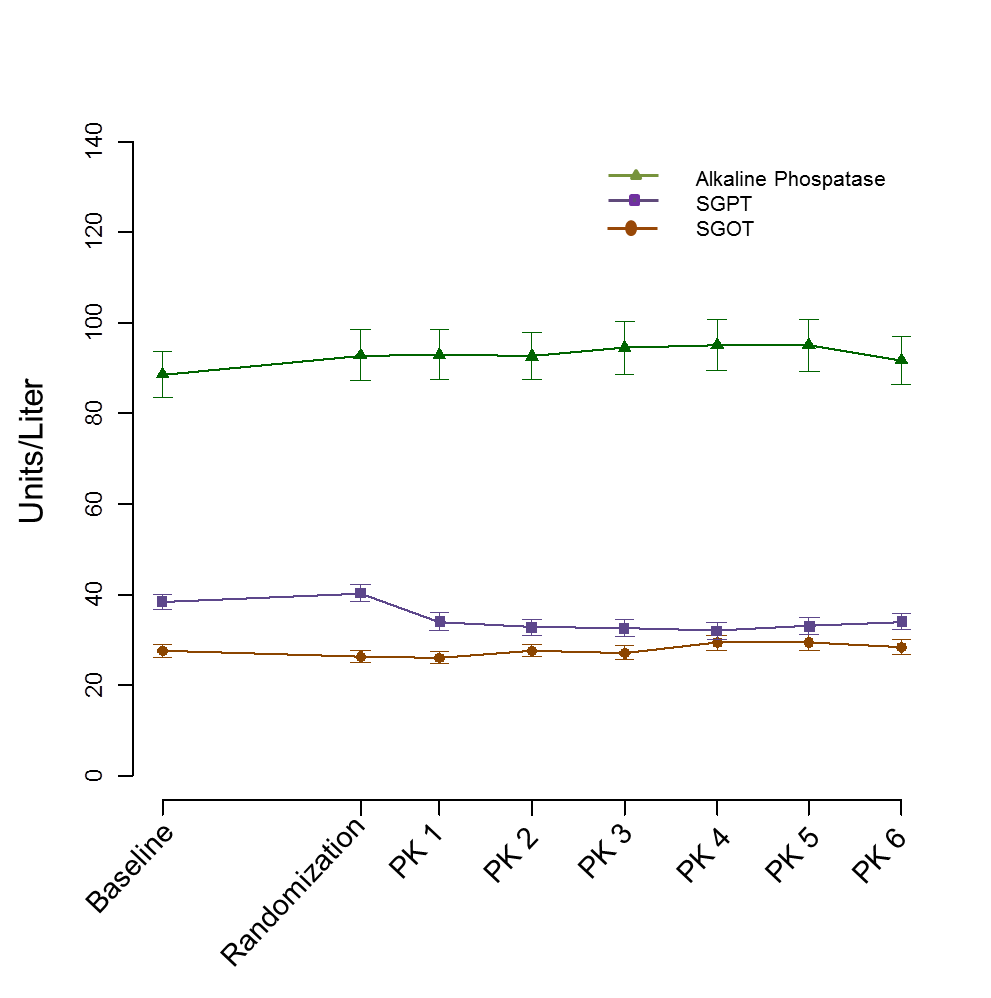
*

(mean ± SEM)

Fig W – Liver Function by Tacrolimus Product in Liver Individuals


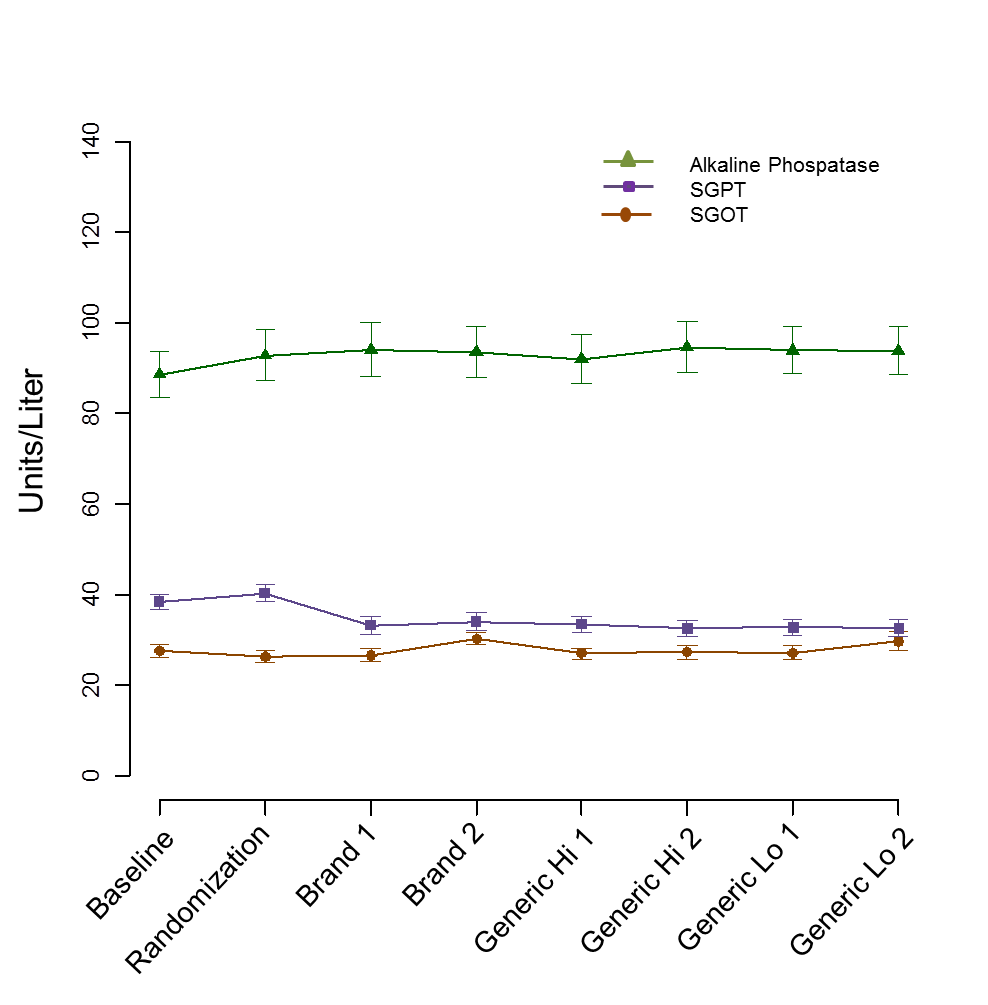


(mean ± SEM)
